# Supplementary material for: Air-Knife-Assisted Spray Coating of Organic Solar Cells
Source: PubMed Central journal article supplement (PMC10450690; doi:10.1021/acsami.3c05306), 2023-07-10
Supplement: am3c05306_si_001.pdf [file am3c05306_si_001.pdf]

# Supporting Information

## Air-Knife Assisted Spray Coating of Organic Solar Cells

*Emma L. K. Spooner,<sup>\*, ‡, †</sup> Elena J. Cassella,<sup>‡</sup> Joel A. Smith,<sup>§</sup> Thomas E. Catley, Sam  
Burholt<sup>#</sup> and David G. Lidzey<sup>\*</sup>*

Department of Physics and Astronomy, University of Sheffield, Hicks Building, Hounsfield Road, S3 7RH, United Kingdom.

<sup>†</sup>Photon Science Institute, Department of Electrical and Electronic Engineering, University of Manchester, Oxford Road, M13 9PY, United Kingdom.

<sup>§</sup> Department of Physics, University of Oxford, Clarendon Laboratory, Parks Road, Oxford, OX1 3PU, United Kingdom.

<sup>#</sup> Diamond Light Source, Harwell Science and Innovation Campus, Didcot, OX11 0DE, United Kingdom.

<sup>‡</sup> E.L.K.S and E.J.C. contributed equally to this work

\*Corresponding authors. D. G. Lidzey: [d.g.lidzey@sheffield.ac.uk](mailto:d.g.lidzey@sheffield.ac.uk). E. L. K. Spooner: [emma.spooner@manchester.ac.uk](mailto:emma.spooner@manchester.ac.uk).

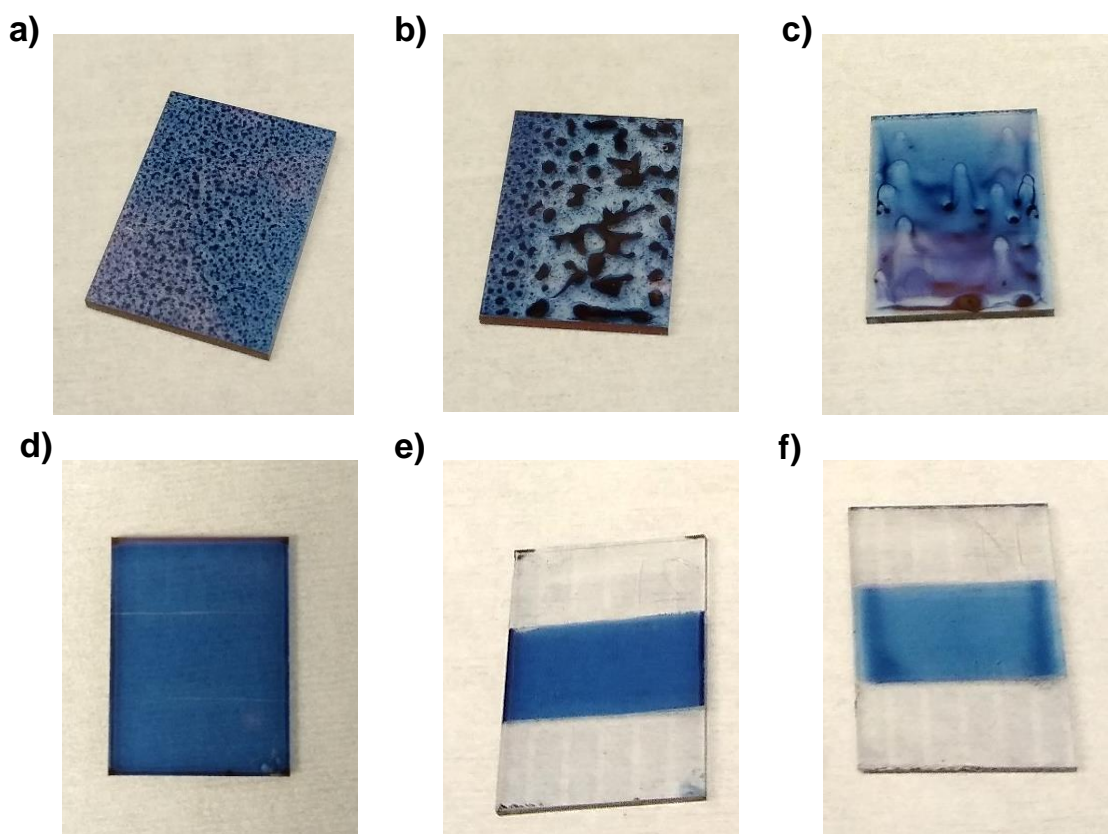

**Figure S1:** a) & b) PM6:Y6 films coated from chloroform, showing poor coalescence. c) PM6:DTY6 film coated from *o*-Xylene, with insufficient solution deposited leading to coalescence issues. A PM6:DTY6 film spin coated from *o*-Xylene d) before and e) after electrode patterning. f) Optimised spray coated film after patterning.

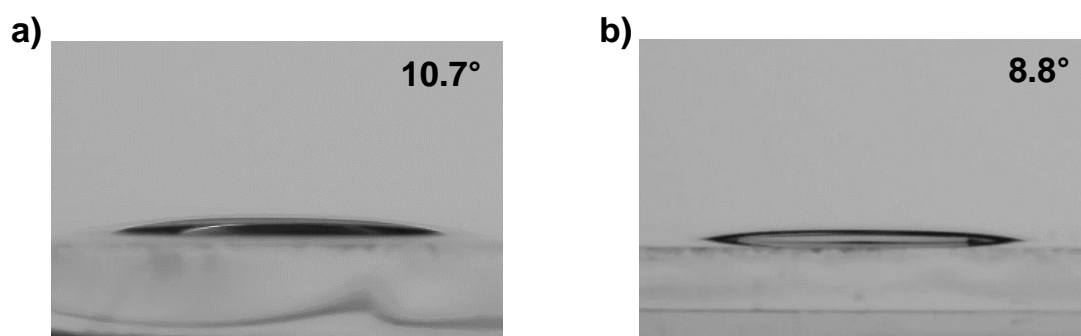

**Figure S2:** Contact angles of a) chloroform on ZnO, b) *o*-Xylene on ZnO.

| <b>Deposition Method</b>                | <b>Thickness of Film (nm)</b> | <b><math>J_{SC}</math> (mA cm<sup>-2</sup>)</b> |
|-----------------------------------------|-------------------------------|-------------------------------------------------|
| Optimised spin coated                   | 139 ± 5.4                     | 22.8 ± 0.7                                      |
| Spray coated- 0 second air-knife delay  | 70 ± 2.1                      | 20.1 ± 0.8                                      |
| Spray coated- 25 second air-knife delay | 84 ± 1.7                      | 19.1 ± 0.4                                      |
| Spray coated- 50 second air-knife delay | 90 ± 4.4                      | 21.4 ± 1.0                                      |
| Spray coated- 75 second air-knife delay | 114 ± 3.3                     | 21.3 ± 0.5                                      |

**Table S1:** Thin film thickness and corresponding  $J_{SC}$  values for each deposition condition.

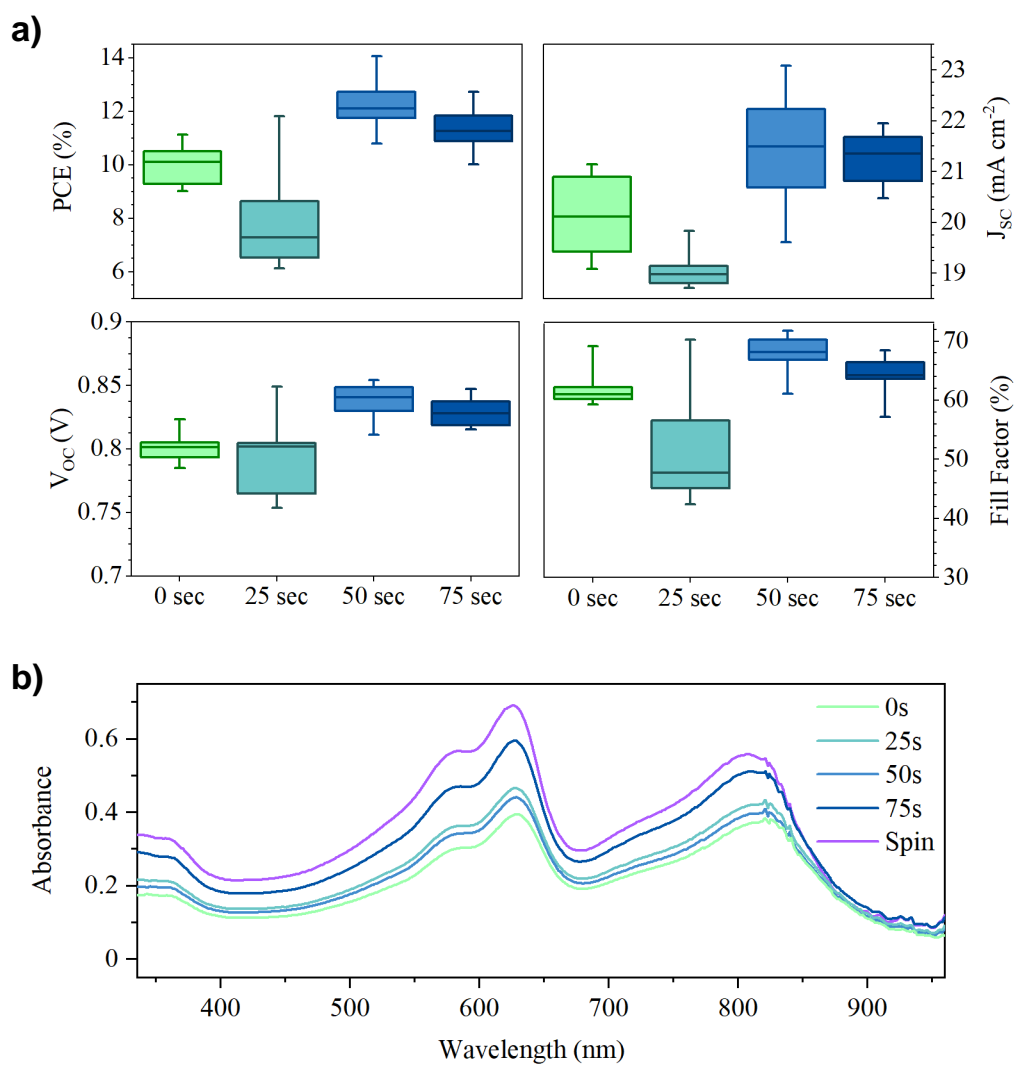

**Figure S3:** **a)** Box plots of device metrics for spray coated PM6:DTY6 devices with varying air-knife delay time. **b)** Absorbance of PM6:DTY6 thin films with varying air-knife delay time, without normalization.

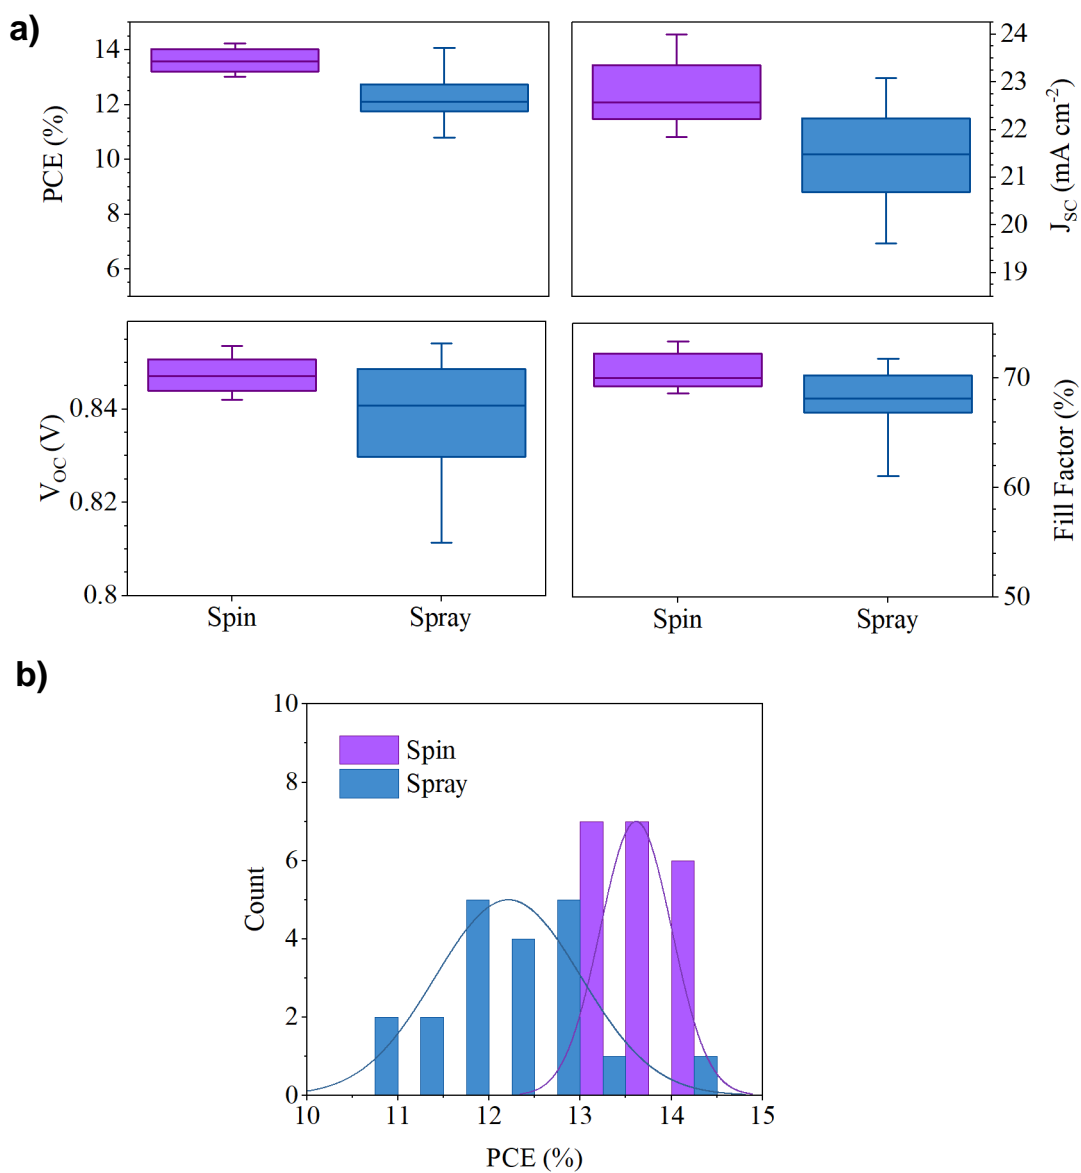

**Figure S4:** **a)** Box plots of device metrics for spin and spray coated (50 second air-knife delay time) PM6:DTY6 devices. **b)** Histogram of spin and spray device efficiencies, with 10 separate devices shown for each, but forward and reverse sweeps treated separately.

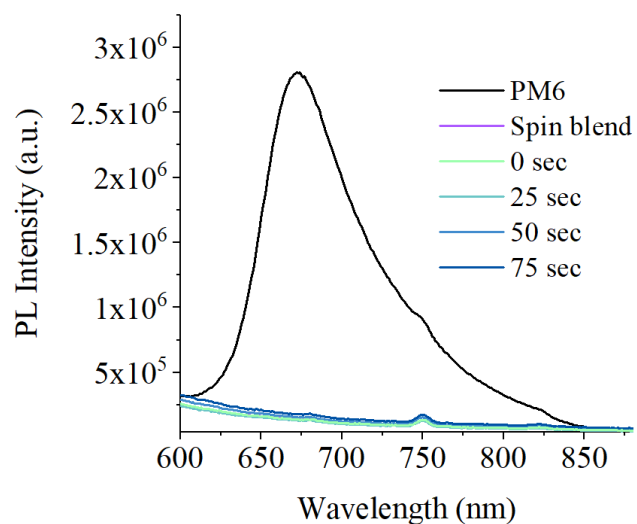

**Figure S5:** Photoluminescence intensity for spin and spray coating films. All films excited at 500 nm. The feature at 750 nm is attributed to an artifact of the diffraction grating.

**Table S2:**  $J_{SC}$  values for representative devices, compared to those achieved via integration of the EQE spectra.

| Deposition Method | Measured $J_{SC-JV}$ ( $\text{mA cm}^{-2}$ ) | Calculated $J_{SC-EQE}$ ( $\text{mA cm}^{-2}$ ) | Discrepancy (%) |
|-------------------|----------------------------------------------|-------------------------------------------------|-----------------|
| Spin              | 23.9                                         | 21.6                                            | 9.6             |
| Spray             | 20.8                                         | 20.4                                            | 1.9             |

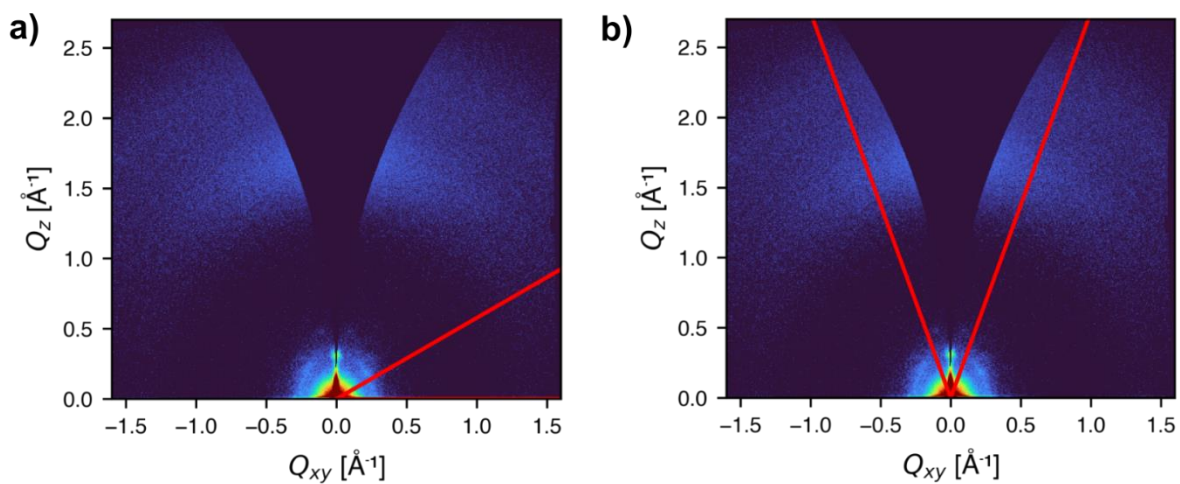

**Figure S6:** Cut regions for the azimuthal integrations shown Figure 6d and 6f, for **a)** in plane and **b)** out of plane regions.

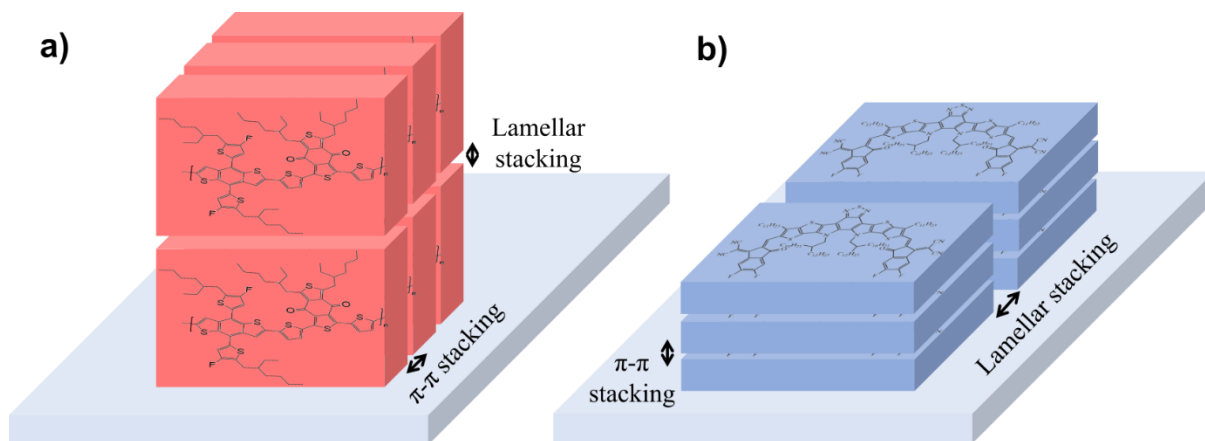

**Figure S7:** Illustration of stacking and relative orientations inferred from GIWAXS for **a)** PM6 (edge-on) and **b)** DTY6 (face-on).

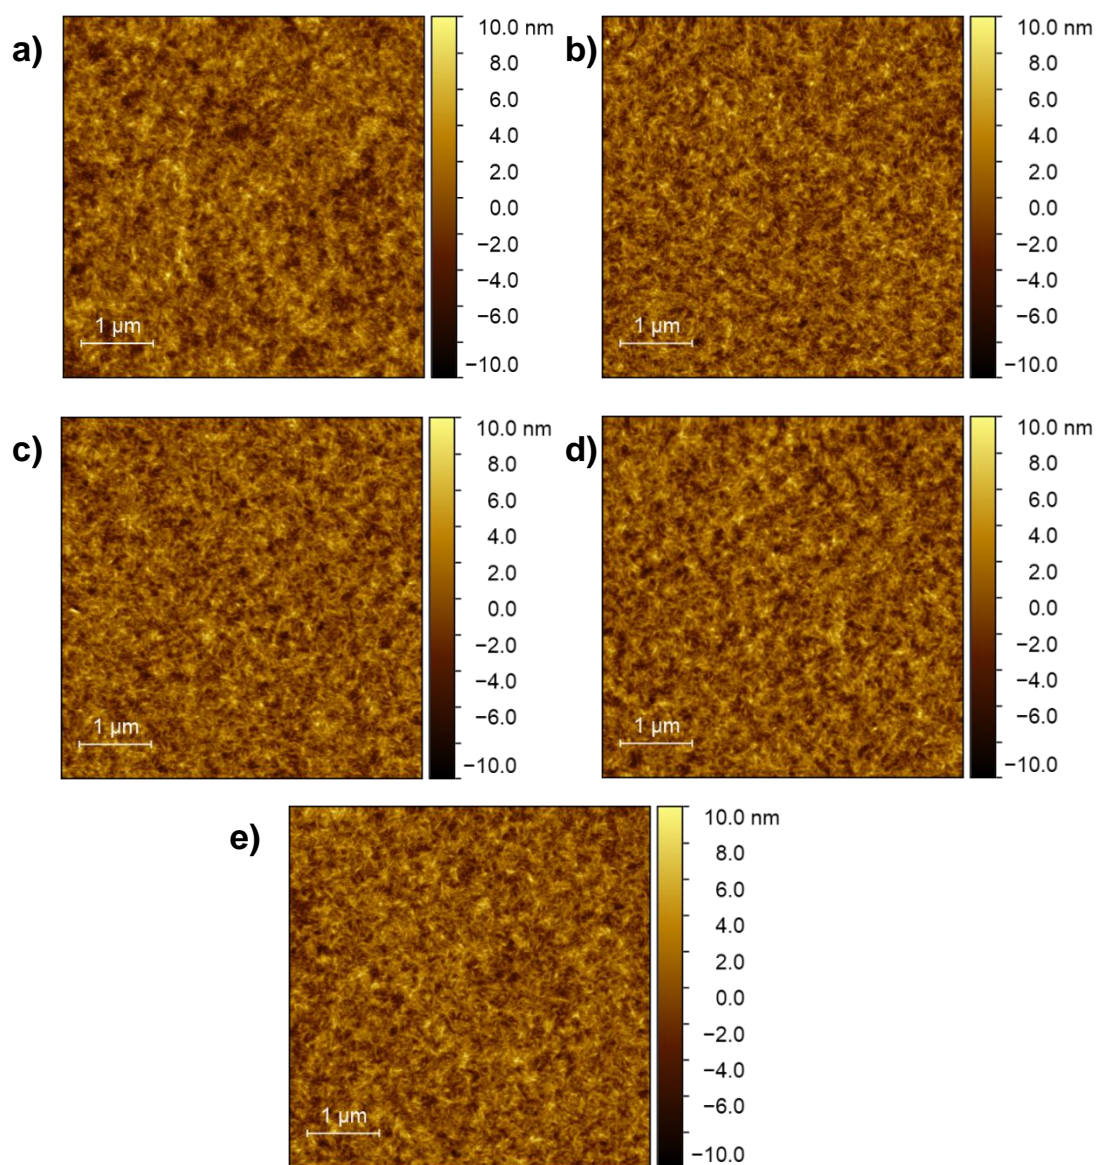

**Figure S8:** AFM images for **a)** Spin coated control. Spray coated films follow at **b)** 0 seconds air-knife delay time, **c)** 25 seconds, **d)** 50 seconds, **e)** 75 seconds.



**Table S3:** Root mean square (RMS) roughness values for each deposition condition calculated from the AFM data. Values given as an average of 3 different measurements across one film, with the error  $\pm 1$  standard deviation.

| <b>Deposition Method</b>                | <b>RMS Roughness (nm)</b> |
|-----------------------------------------|---------------------------|
| Spin coated                             | $2.11 \pm 0.10$           |
| Spray coated- 0 second air-knife delay  | $2.06 \pm 0.01$           |
| Spray coated- 25 second air-knife delay | $2.08 \pm 0.06$           |
| Spray coated- 50 second air-knife delay | $2.09 \pm 0.02$           |
| Spray coated- 75 second air-knife delay | $2.06 \pm 0.03$           |
